# Supplementary material for: Sex Differences in the Renal Function Decline of Patients with Type 2 Diabetes
Source: Hindawi journal article supplement (doi:10.1155/2016/4626382), 2016-01-01
Supplement: f1 [file 4626382.f1.pdf]

Supplemental Table 1. The relationships between baseline variables and the annual CKD/EPI-eGFR change in males and females

|                           | Univariate analysis |                  | Multivariable analysis |                 |
|---------------------------|---------------------|------------------|------------------------|-----------------|
|                           | $\beta^a$           | <i>P</i> -value  | $\beta^a$              | <i>P</i> -value |
| <b>Males</b>              |                     |                  |                        |                 |
| DR (yes/ no)              | <b>-0.329</b>       | <b>&lt;0.001</b> | <b>-0.213</b>          | <b>0.001</b>    |
| Proteinuria (yes/ no)     | <b>-0.300</b>       | <b>&lt;0.001</b> | <b>-0.179</b>          | <b>0.007</b>    |
| Diabetes duration (years) | <b>-0.179</b>       | <b>0.007</b>     | -0.098                 | 0.125           |
| HbA1c (% or mmol/mol)     | <b>-0.154</b>       | <b>0.016</b>     | -0.089                 | 0.145           |
| SBP (mmHg)                | <b>-0.143</b>       | <b>0.024</b>     | -0.052                 | 0.397           |
| LDL-cholesterol (mmol/L)  | -0.014              | 0.823            | -                      | -               |
| Overweight (yes/ no)      | 0.032               | 0.618            | -                      | -               |
| Ever smoker (yes/ no)     | -0.009              | 0.890            | -                      | -               |
| <b>Females</b>            |                     |                  |                        |                 |
| DR (yes/ no)              | <b>-0.420</b>       | <b>&lt;0.001</b> | <b>-0.235</b>          | <b>0.030</b>    |
| Proteinuria (yes/ no)     | <b>-0.433</b>       | <b>&lt;0.001</b> | <b>-0.322</b>          | <b>0.001</b>    |
| Diabetes duration (years) | <b>-0.216</b>       | <b>0.036</b>     | -0.147                 | 0.130           |
| HbA1c (% or mmol/mol)     | <b>-0.314</b>       | <b>0.002</b>     | -0.117                 | 0.222           |
| SBP (mmHg)                | -0.201              | 0.051            | -0.054                 | 0.540           |
| LDL-cholesterol (mmol/L)  | <b>-0.313</b>       | <b>0.002</b>     | <b>-0.209</b>          | <b>0.019</b>    |
| Overweight (yes/ no)      | 0.074               | 0.485            | -                      | -               |
| Ever smoker (yes/ no)     | 0.017               | 0.872            | -                      | -               |

<sup>a</sup> Adjusted for baseline age.

Supplemental Table 2. The effects of the combination of sex and metabolic status-abnormalities on the annual CKD/EPI-eGFR decline

| Sex    | Clinical feature             | N   | Annual CKD/EPI-         |               |              |
|--------|------------------------------|-----|-------------------------|---------------|--------------|
|        |                              |     | eGFR change<br>(%/year) | $\beta^a$     | P-value      |
| Male   | HbA1c < 7.0% (53.0 mmol/mol) | 43  | -1.1 ± 1.0              | 0             | -            |
|        | HbA1c ≥ 7.0% (53.0 mmol/mol) | 204 | -1.7 ± 1.8              | -0.030        | 0.694        |
| Female | HbA1c < 7.0% (53.0 mmol/mol) | 13  | -1.7 ± 1.0              | -0.032        | 0.570        |
|        | HbA1c ≥ 7.0% (53.0 mmol/mol) | 84  | -2.5 ± 3.0              | -0.115        | 0.139        |
| Male   | LDL-cholesterol < 3.4 mmol/L | 146 | -1.6 ± 1.7              | 0             | -            |
|        | LDL-cholesterol ≥ 3.4 mmol/L | 101 | -1.6 ± 1.6              | 0.023         | 0.664        |
| Female | LDL-cholesterol < 3.4 mmol/L | 38  | -1.8 ± 1.5              | -0.006        | 0.917        |
|        | LDL-cholesterol ≥ 3.4 mmol/L | 59  | -2.8 ± 3.3              | <b>-0.134</b> | <b>0.023</b> |
| Male   | SBP < 140 mmHg               | 147 | -1.4 ± 1.4              | 0             | -            |
|        | SBP ≥ 140 mmHg               | 100 | -1.9 ± 2.0              | 0.004         | 0.935        |
| Female | SBP < 140 mmHg               | 40  | -1.8 ± 2.5              | -0.044        | 0.423        |
|        | SBP ≥ 140 mmHg               | 57  | -2.8 ± 2.9              | -0.101        | 0.096        |

Data are presented as means ± SD.

<sup>a</sup> Adjusted for baseline age, diabetes duration, DR, proteinuria, overweight, ever smoker, HbA1c (except for first model), LDL-cholesterol (except for second model) and SBP (except for third model).

Supplemental Table 3. The clinical characteristics of males and PS-matched females

|                                     | Males<br>(N = 41) | Females<br>(N = 41) | P-value |
|-------------------------------------|-------------------|---------------------|---------|
| Annual CKD/EPI-eGFR change (%/year) | -1.4 ± 1.0        | -2.1 ± 2.4          | 0.092   |
| Variables used in the PS matching   |                   |                     |         |
| Age (years)                         | 52.9 ± 7.4        | 51.1 ± 9.0          | 0.318   |
| Diabetes duration (years)           | 4.9 ± 4.9         | 4.4 ± 4.9           | 0.703   |
| DR (yes/ no)                        | 2 (4.9)           | 6 (14.6)            | 0.264   |
| HbA1c (%)                           | 9.5 ± 2.7         | 9.4 ± 2.2           | 0.915   |
| HbA1c (mmol/mol)                    | 80.1 ± 29.8       | 79.5 ± 24.0         | 0.915   |
| Proteinuria (yes/ no)               | 6 (14.6)          | 10 (24.4)           | 0.404   |
| SBP (mmHg)                          | 141.2 ± 21.8      | 143.0 ± 22.9        | 0.716   |
| LDL-Cholesterol (mmol/L)            | 3.3 ± 0.8         | 3.3 ± 0.6           | 0.969   |

Data are presented as means ± SD or number (%).
